# Supplementary material for: The Trem2 R47H Alzheimer’s risk variant impairs splicing and reduces Trem2 mRNA and protein in mice but not in humans
Source: Springer Nature journal article supplement (doi:10.1186/s13024-018-0280-6), 2018-09-05

A

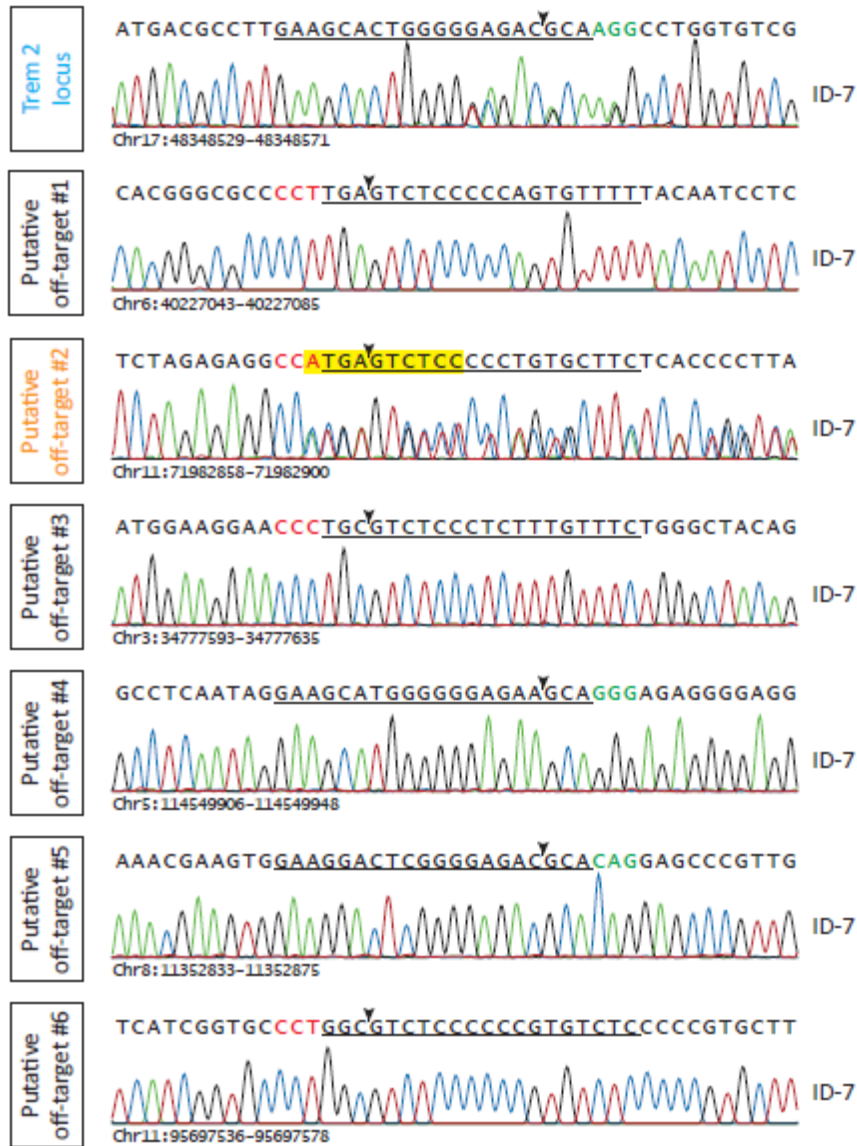

B

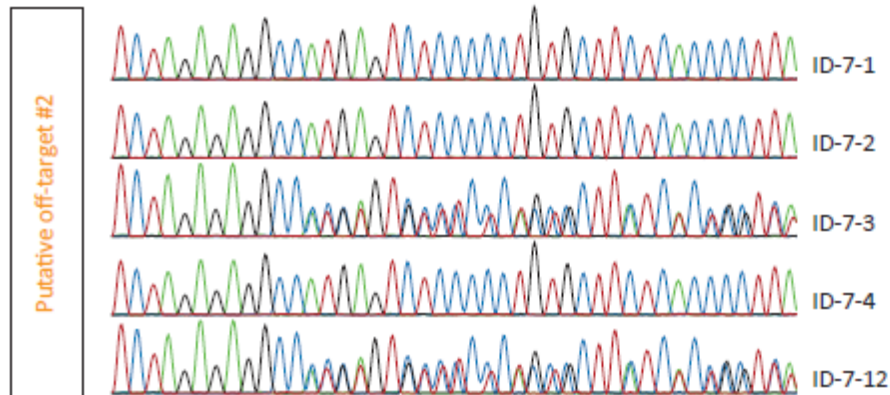

Supplement: MOESM1 [file 16103558]
