# Supplementary material for: The Trem2 R47H Alzheimer’s risk variant impairs splicing and reduces Trem2 mRNA and protein in mice but not in humans
Source: Springer Nature journal article supplement (doi:10.1186/s13024-018-0280-6), 2018-09-05
Supplement: MOESM2 [file 16103558]

Table S1. Allele specific quantitative PCR for Trem2 R47H knock-in mice

| Ct mean  |              |              |        |
|----------|--------------|--------------|--------|
|          | WT allele    | R47H allele  | RQ     |
| WT       | 16,00        | Undetermined | -      |
|          | 15,98        | Undetermined | -      |
|          | 16,12        | Undetermined | -      |
| R47H hom | Undetermined | 19,92        | -      |
|          | Undetermined | 19,64        | -      |
|          | Undetermined | 19,24        | -      |
| R47H het | 17,22        | 24,68        | 0,0057 |
|          | 17,43        | 23,20        | 0,0183 |
|          | 17,02        | 23,00        | 0,0159 |
