# Supplementary material for: The Trem2 R47H Alzheimer’s risk variant impairs splicing and reduces Trem2 mRNA and protein in mice but not in humans
Source: Springer Nature journal article supplement (doi:10.1186/s13024-018-0280-6), 2018-09-05
Supplement: MOESM3 [file 16103558]

a

Normal splicing of Trem2 exon 1 and 2

5' UTR-ATGGGACCTCTCCACCAGTTTCTCCTGCTGCTGATCACAG//GTGGGACCACAGGAGGGAC  
CTA...TGTCTCCTCTGCAG//CCCTGTCCCAAGCCCTCAACACCACGGTGCTGCAGGGCATGGCCGG  
CCAGTCCTTGAGGGTGTCACTGTACTTATGACGCCTTGAAGCACTGGGGGAGACGCAAGGCCTGGTGTG  
GGCAGCTGGGTGAGGAGGGCCCATGCCAGCGTGTGGTGTGAGCACACACGGTGTGTGGCTGCTGGCCTTC  
CTGA...

Aberrant splicing of Trem2 exon 1 and 2

5' UTR-ATGGGACCTCTCCACCAGTTTCTCCTGCTGCTGATCACAG//GTGGGACCACAGGAGGGAC  
CTA...TGTCTCCTCTGCAGCCCTGTCCCAAGCCCTCAACACCACGGTGCTGCAGGGCATGGCCGGCC  
AGTCCTTGAGGGTGTCACTGTACTTATGACGCCTTGAAGCACTGGGGGAGACGCAAGGCCTGGTGTGCG  
CAG//CTGGGCTGAAGGAGGGCCCATGCCAGCGTGTGGTGTGAGCACACACGGTGTGTGGCTGCTGGCCTTC  
CTGA... Stop
