# Supplementary material for: The Trem2 R47H Alzheimer’s risk variant impairs splicing and reduces Trem2 mRNA and protein in mice but not in humans
Source: Springer Nature journal article supplement (doi:10.1186/s13024-018-0280-6), 2018-09-05
Supplement: MOESM5 [file 16103558]

Table S2. Allele specific quantitative PCR for human TREM2 materials

| Ct Mean                      |              |              |       |
|------------------------------|--------------|--------------|-------|
|                              | WT allele    | R47H allele  | RQ    |
| iMG TREM2 wt                 | 19,922       | Undetermined | -     |
|                              | 19,122       | Undetermined | -     |
|                              | 26,041       | Undetermined | -     |
|                              | 19,616       | Undetermined | -     |
| BAC mice TREM2 wt            | 19,005       | Undetermined | -     |
|                              | 19,199       | Undetermined | -     |
| BAC mice TREM2 R47H Hom      | Undetermined | 17,296       | -     |
|                              | Undetermined | 17,628       | -     |
| iMG TREM2 R47H Het           | 20,790       | 20,737       | 1,038 |
|                              | 20,074       | 20,061       | 1,009 |
|                              | 20,674       | 20,589       | 1,061 |
|                              | 19,804       | 19,905       | 0,932 |
|                              | 21,68        | 21,63        | 1,034 |
|                              | 20,89        | 20,65        | 1,177 |
|                              | 21,68        | 21,63        | 1,034 |
| TREM2 R47H Het patient brain | 26,99        | 27,09        | 0,934 |
|                              | 31,20        | 30,86        | 1,270 |
